# Supplementary material
Source: PubMed Central journal article supplement (PMC7483437)
Supplement: bloodBLD2020007252-suppl1.pdf [file bloodBLD2020007252-suppl1.pdf]

## Supplemental Material

### **Platelet activation and platelet-monocyte aggregates formation trigger tissue factor expression in severe COVID-19 patients**

Running Title: Platelets drive monocyte TF expression in COVID-19

Eugenio D. Hottz<sup>\*1,2</sup>, Isaclaudia G. Azevedo-Quintanilha<sup>1</sup>, Lohanna Palhinha<sup>1</sup>, Livia Teixeira<sup>1</sup>, Ester A. Barreto<sup>1</sup>, Camila Ribeiro R. de Pão<sup>1</sup>, Cassia Righy<sup>3,5</sup>, Sérgio Franco<sup>3</sup>, Thiago Moreno L. Souza<sup>1,4</sup>, Pedro Kurtz<sup>3,6</sup>, Fernando A. Bozza<sup>5,6</sup>, Patrícia T. Bozza<sup>\*1</sup>.

<sup>1</sup>Laboratory of Immunopharmacology, Oswaldo Cruz Institute, Oswaldo Cruz Foundation, RJ, Brazil;

<sup>2</sup>Laboratory of Immunothrombosis, Department of Biochemistry, Federal University of Juiz de Fora (UFJF), Juiz de Fora, MG, Brazil;

<sup>3</sup>Paulo Niemeyer State Brain Institute, Rio de Janeiro, RJ, Brazil;

<sup>4</sup>Center for Technological Development in Health (CDTS), Oswaldo Cruz Foundation, RJ, Brazil.

<sup>5</sup>National Institute of infectious disease Evandro Chagas, Oswaldo Cruz Foundation, RJ, Brazil.

<sup>6</sup>D'Or institute for Research and Education, Rio de Janeiro, RJ, Brazil.

#### **\*Corresponding authors**

Patrícia T. Bozza

[pbozza@ioc.fiocruz.br](mailto:pbozza@ioc.fiocruz.br) or [pbozza@gmail.com](mailto:pbozza@gmail.com)

Eugenio D. Hottz;

[eugenio.hottz@icb.ufjf.br](mailto:eugenio.hottz@icb.ufjf.br) or [eugeniohottz@gmail.com](mailto:eugeniohottz@gmail.com)

**Supplemental Table 1:** Characteristics of COVID-19 patients admitted to the ICU based on the requirement of invasive mechanical ventilation or noninvasive oxygen supplementation.

| Characteristics <sup>1</sup>                  | Noninvasive O <sub>2</sub> Supplementation (N=8) | Mechanical ventilation (N=27) | p value <sup>2</sup> |
|-----------------------------------------------|--------------------------------------------------|-------------------------------|----------------------|
| Age, years                                    | 48 (34 – 65)                                     | 58 (48 – 64)                  | 0.3825               |
| Sex, male                                     | 5 (62.5)                                         | 12 (44.4)                     | 0.4430               |
| SAPS 3                                        | 35 (29.5 – 46)                                   | 64 (58 – 73)                  | <b>&lt;0.0001</b>    |
| PaO <sub>2</sub> /FiO <sub>2</sub> ratio      | 483 (372 – 519)                                  | 141 (98 – 172)                | <b>0.0005</b>        |
| Vasopressor <sup>3</sup>                      | 0 (0 %)                                          | 16 (59.3 %)                   | <b>0.0038</b>        |
| Time from symptom onset to blood sample, days | 11 (8 – 15)                                      | 12 (8 – 17)                   | 0.4178               |
| 28-day mortality                              | 0 (0 %)                                          | 17 (63 %)                     | <b>0.0029</b>        |
| <b>Comorbidities</b>                          |                                                  |                               |                      |
| Obesity                                       | 3 (37.5 %)                                       | 4 (14.8 %)                    | 0.3117               |
| Hypertension                                  | 4 (50 %)                                         | 14 (51.9 %)                   | 1.0000               |
| Diabetes                                      | 1 (12.5 %)                                       | 7 (25.9 %)                    | 0.6478               |
| Cancer                                        | 0 (0 %)                                          | 3 (11.1 %)                    | 1.0000               |
| Chronic heart disease                         | 1 (12.5 %) <sup>4</sup>                          | 2 (7.4 %) <sup>5</sup>        | 0.5531               |
| <b>Laboratory findings on admission</b>       |                                                  |                               |                      |
| Leukocytes, x 1000/μL                         | 98 (35.5 – 110)                                  | 143 (104 – 210)               | <b>0.007</b>         |
| Lymphocytes, cells/μL                         | 1269 (884 – 2343)                                | 1136 (485 – 1556)             | 0.3180               |
| Monocytes, cells/μL                           | 495 (214 – 714.5)                                | 712 (550 – 908)               | 0.1194               |
| Platelets, x 1000/μL                          | 223 (157 – 320.5)                                | 193 (142.5 – 251)             | 0.5985               |
| C Reactive Protein, mg/L                      | 3.41 (0.73 – 14.04)                              | 18.2 (7.9 – 26.13)            | <b>0.0105</b>        |
| Fibrinogen, mg/dL                             | 426 (368 – 573)                                  | 545 (375 – 622)               | 0.5285               |
| D-dimer, IU/mL                                | 675 (371.5 – 2,359)                              | 6,520 (3,337 – 17,065)        | <b>0.0001</b>        |
| IL-6, pg/mL                                   | 20.5 (11 – 256.8)                                | 45 (20 – 86)                  | 0.4337               |

<sup>1</sup>Numerical variables are represented as the median and the interquartile range, and qualitative variables as the number and the percentage.

<sup>2</sup>The qualitative variables were compared using the two tailed Fisher exact test, and the numerical variables using the t test for parametric and the Mann Whitney U test for nonparametric distributions.

<sup>3</sup>Dopamine, epinephrine/norepinephrine, vasopressin or phenylephrine.

<sup>4</sup>Coronary artery disease.

<sup>5</sup>Congestive heart failure.

**Supplemental Table 2:** Characteristics of COVID-19 patients admitted to the ICU according to the 28-day mortality outcome as survivors or nonsurvivors.

| Characteristics <sup>1</sup>                  | Survivors<br>(N=18) | Nonsurvivors<br>(N=17) | p value <sup>2</sup> |
|-----------------------------------------------|---------------------|------------------------|----------------------|
| Age, years                                    | 57 (40 – 63)        | 58 (52 – 73)           | 0.1722               |
| Sex, male                                     | 7 (38.8 %)          | 10 (58.8 %)            | 0.3175               |
| Respiratory support                           |                     |                        |                      |
| Mechanical ventilation                        | 10 (55.6 %)         | 17 (100 %)             | <b>0.0029</b>        |
| SAPS 3                                        | 55.5 (37 – 64)      | 68 (59 – 78.5)         | <b>0.0024</b>        |
| PaO <sub>2</sub> /FiO <sub>2</sub> ratio      | 196 (155 – 429)     | 130 (87 – 150)         | <b>0.00114</b>       |
| Vasopressor <sup>3</sup>                      | 5 (27.8 %)          | 10 (58.8 %)            | 0.092                |
| Time from symptom onset to blood sample, days | 12 (9 – 17)         | 13 (8 – 18)            | 0.8330               |
| <b>Comorbidities</b>                          |                     |                        |                      |
| Obesity                                       | 5 (27.8 %)          | 2 (11.8 %)             | 0.4018               |
| Hypertension                                  | 9 (50 %)            | 9 (52.9 %)             | 1.0000               |
| Diabetes                                      | 3 (16.7 %)          | 5 (29.4 %)             | 0.4430               |
| Cancer                                        | 2 (11.1 %)          | 1 (5.9 %)              | 1.0000               |
| Chronic heart disease                         | 2 (11.1 %)          | 1 (5.9 %)              | 1.0000               |
| <b>Laboratory findings on admission</b>       |                     |                        |                      |
| Leukocytes, x 1000/ $\mu$ L                   | 106 (76 – 140)      | 168 (122.5 – 268.5)    | <b>0.0024</b>        |
| Lymphocytes, cells/ $\mu$ L                   | 1288 (939 – 1579)   | 1035 (283 – 1706)      | 0.5216               |
| Monocytes, cells/ $\mu$ L                     | 495 (214 – 715)     | 712 (550 – 9-8)        | <b>0.0097</b>        |
| Platelets, x 1000/ $\mu$ L                    | 198 (154 – 324)     | 190 (136.8 – 233.5)    | 0.3455               |
| C Reactive Protein, mg/L                      | 7.29 (3.68 – 18.09) | 20.3 (10.17 – 27.03)   | <b>0.0349</b>        |
| Fibrinogen, mg/dL                             | 529 (366 – 582)     | 545 (402 – 622)        | 0.5943               |
| D-dimer, IU/mL                                | 2,436 (699 – 6,270) | 7,731 (3,438 – 22,080) | <b>0.0021</b>        |
| IL-6, pg/mL                                   | 21.5 (13.3 – 85.3)  | 56.25 (26 – 127.5)     | <b>0.0581</b>        |

<sup>1</sup>Numerical variables are represented as the median and the interquartile range, and qualitative variables as the number and the percentage.

<sup>2</sup>The qualitative variables were compared using the two tailed Fisher exact test, and the numerical variables using the t test for parametric and the Mann Whitney U test for nonparametric distributions.

<sup>3</sup>Dopamine, epinephrine/norepinephrine, vasopressin or phenylephrine.

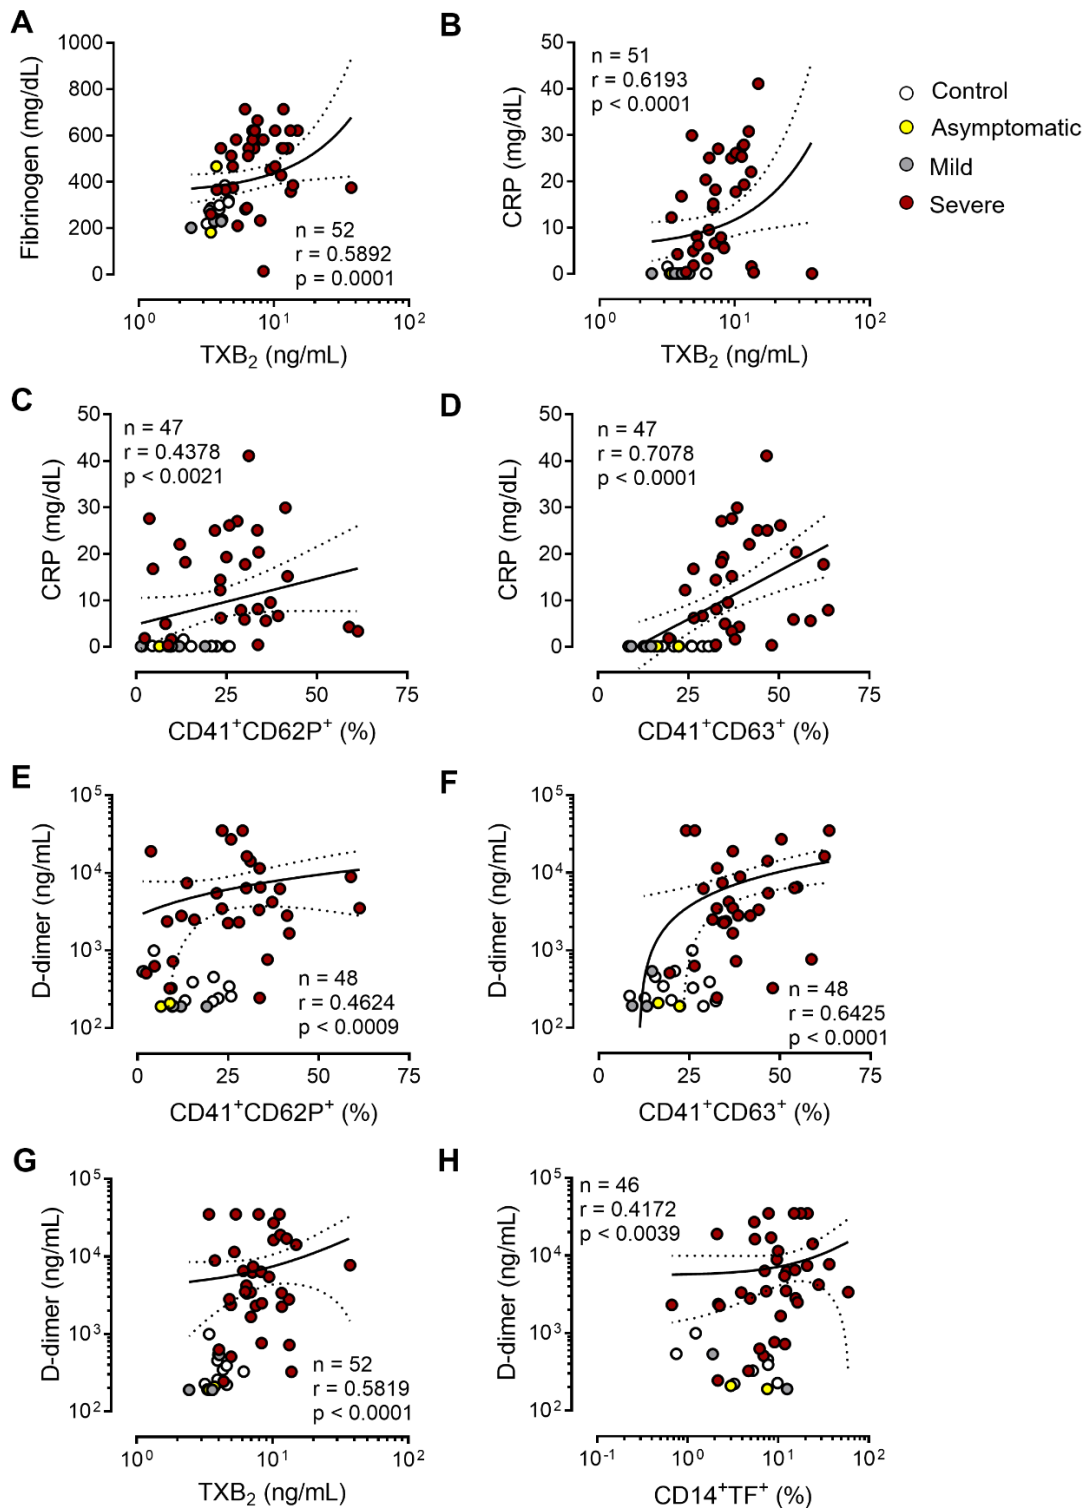

**Supplemental Figure 1: Platelet activation and monocyte TF expression associates with hyperinflammation and hypercoagulability in COVID-19.** (A-B) The concentration of TXB<sub>2</sub> in plasma was plotted against the fibrinogen (A) and C reactive protein (B) levels. (C-D) The percentage of P-selectin (CD62P) (C) and CD63 (D) expression on platelets were plotted against the CRP concentration in plasma. (E-H) The percentage of P-selectin (CD62P) (E) and CD63 (F) expression on platelets, the concentration of TXB<sub>2</sub> in plasma (G) and the percentage of TF-expressing monocytes (H) were plotted against the D-dimer concentration in plasma. One outlier (CRP = 621.64 mg/dL) was excluded from the analysis in panels B-D according to the ROUT test. Linear regression (with the 95 % confidence interval) and Spearman's correlation were calculated according to the distribution of the dots.
